# Supplementary material
Source: PubMed Central journal article supplement (PMC3007158)
Supplement: JCI44474sd.pdf [file JCI44474sd.pdf]

## Supplemental Appendix

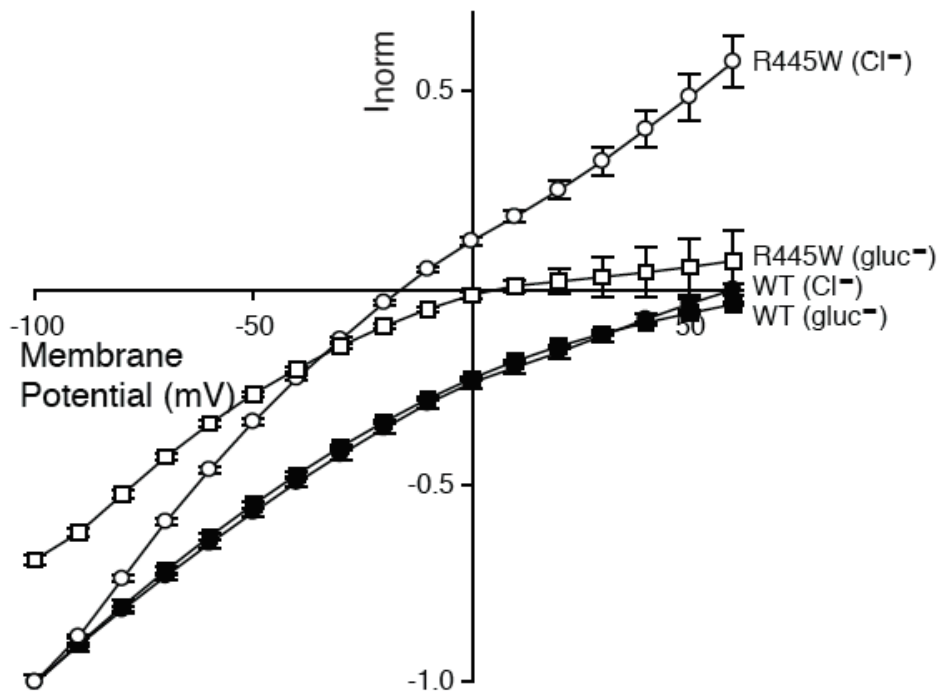

**Supplemental Figure 1** Current versus membrane potential plots of conductance elicited by glutamate for SLC1A1 WT and R445W. Current ( $I_{norm}$ , y-axis) was normalized to the maximal current defined as unit  $I_{max}$ ; membrane potential was measured in mV (x-axis). In WT SLC1A1, the glutamate-activated conductance has two components, an inwardly rectifying glutamate transport conductance and an uncoupled chloride conductance. L-glutamate (100  $\mu$ M) was applied to *Xenopus laevis* oocytes expressing WT (filled symbols) or R445W (open symbols) cRNA in a chloride-containing buffer (circles) or chloride-free buffer containing the impermeant anion gluconate ( $gluc^-$ , squares). In WT, the replacement of chloride with gluconate ions did not significantly change the L-glutamate activated conductance as the contribution from chloride to the transport current of SLC1A1 was minimal. In contrast, when the chloride in the recording buffer was replaced with gluconate (which removes the uncoupled chloride current), the reversal potential of the L-glutamate activated conductance of R445W shifted to more depolarized potentials and the amplitude of the conductance at positive membrane potentials was greatly reduced. In *Xenopus*

*laevis* oocytes, the reversal potential for chloride ions (Cl<sup>-</sup>) is ~ -24 mV (1), which was similar to the reversal potential observed for R445W (-16 ± 1 mV). Thus, the contribution of the uncoupled chloride conductance to the total transport current of R445W was reduced when chloride was replaced by gluconate. These data demonstrate that L-glutamate-activated conductance of R445W was mainly carried by the uncoupled chloride conductance, with a small contribution from transport, which is also consistent with a higher affinity and reduced rate of flux of substrate (Figure 3A, B and C) (2). This is also consistent with data in Supplemental Figure 1 which demonstrates that the proportion of current due to transport compared to the uncoupled anion current is reduced compared to WT. Furthermore, no glutamate-activated cation leak was observed from R445W, which differs from the large glutamate-dependent cation leak observed when R445 is mutated to serine (S), methionine (M) or glutamine (Q) (3). In the absence of glutamate, background leak current observed for oocytes expressing the R445W mutant was similar to that of oocytes expressing WT SLC1A1 (data not shown). Data were normalized to the glutamate-activated current at -100 mV in chloride buffer and represent mean ± s.e.m. of at least 3 oocytes.

### **Supplementary References**

1. Barish, M.E. 1983. A transient calcium-dependent chloride current in the immature *Xenopus* oocyte. *J Physiol* **342**:309-325.
2. Fairman, W.A., Vandenberg, R.J., Arriza, J.L., Kavanaugh, M.P., and Amara, S.G. 1995. An excitatory amino-acid transporter with properties of a ligand-gated chloride channel. *Nature* **375**:599-603.
3. Borre, L., and Kanner, B.I. 2004. Arginine 445 controls the coupling between glutamate and cations in the neuronal transporter EAAC-1. *J Biol Chem* **279**:2513-2519.

| Primer name   | Forward Primer                 | Reverse Primer               | Amplicon Size (bp) | Comments                                                                                                               |
|---------------|--------------------------------|------------------------------|--------------------|------------------------------------------------------------------------------------------------------------------------|
| SLC1A1prom    | TGAGTAGCCGAGCAAGAGG            | ACAGGGGAGAGGTGAGAGC          | 743                |                                                                                                                        |
| SLC1A1-5'UTR  | TGAGTAGCCGAGCAAGAGG            | ACAGGGGAGAGGTGAGAGC          | 572                |                                                                                                                        |
| SLC1A1ex1     | TCCCTCCTTCCTCGCTGGTTG          | GCTACTTGCTTCCCTTTCTACCCC     | 669                |                                                                                                                        |
| SLC1A1ex2     | CCATAGACATAGATACAGGAGAACT<br>C | TTAGGCTTTGTGTTCCCACCC        | 607                |                                                                                                                        |
| SLC1A1ex3     | CCATTGTCTGTAGATGAGAACGCC       | AAGTCTGTCTGCCAGGTTCAAGT<br>G | 500                |                                                                                                                        |
| SLC1A1ex4     | ACACACACACAGACGCACACG          | CCAATCCATCCCAGCATCTCTC       | 639                |                                                                                                                        |
| SLC1A1ex5     | AGGGGCCAGAAGAGAAACC            | ACCAGAGGAAAAGCAAAGAGG        | 566                |                                                                                                                        |
| SLC1A1ex6     | TCTGCCTCGCTTTTAGTTCC           | AGAGCACAGCCTTTTTTCACC        | 540                |                                                                                                                        |
| SLC1A1ex7     | ATCTTCTCATTTCTGGACCTGTGC       | CAGCAACAAAAGCCCCCAC          | 422                |                                                                                                                        |
| SLC1A1ex8     | CTTCAATTCCCATCCTGTGC           | GGCTATTCTTGCTTGCTTGG         | 608                |                                                                                                                        |
| SLC1A1ex9     | GCAGGAATAGCACACACAGG           | CAGGTCCAGGAATCAGAAGG         | 683                |                                                                                                                        |
| SLC1A1ex10    | GCTCAGGAAGGGGTTATGG            | GAGTGATGGCTTTGGCTACC         | 646                |                                                                                                                        |
| SLC1A1ex11    | TGGAACAAGGGAGTAGGAAGG          | GGAAAATTAAAGCAGCAACAGG       | 694                |                                                                                                                        |
| SLC1A1ex12    | GAGCCTTCAGTCAGTCAGCC           | TTACCCACACCCAAATCC           | 583                |                                                                                                                        |
| SLC1A1-3'UTRa | TCTCATTCACCCAGACCTCAC          | CAGTTACCAGCGTCCCAATAC        | 660                |                                                                                                                        |
| SLC1A1-3'UTRb | TTTGGAAGAAAGGGAGAAGG           | GATAACAGAAGTGCAAGGATGG       | 536                |                                                                                                                        |
| SLC1A1-3'UTRc | TGGTGATACTCCAAGGTGG            | AGCAGAATGACAAGCAGAGG         | 468                |                                                                                                                        |
| SLC1A1-3'UTRd | CAGTGGTTCGGGGGAAATAG           | CCCACACCCATCCAAGTAAG         | 720                |                                                                                                                        |
| SLC1A1poly A  | CACTTCCCTCATTCTTTCCC           | GGGGTCTTTCTGTGTTGTCC         | 714                |                                                                                                                        |
| I395del-RFLP  | CGCTGTGCTGAAGAAAATAACC         | GAGTGATGGCTTTGGCTACC         | 371                | Wildtype allele (461 bp) is not digested by <i>BsaBI</i> . I395del allele (458 bp) is digested by <i>BsaBI</i> to give |

|                  |                                  |                                  |      |                                                                                                                                                                  |
|------------------|----------------------------------|----------------------------------|------|------------------------------------------------------------------------------------------------------------------------------------------------------------------|
| R445W-RFLP       | TTCTTTGGGAGAAGAGGAAGG            | GGTCTGGGTGAATGAGATGG             | 481  | 245 and 213 bp fragments.<br>Wildtype allele (481 bp) is digested by <i>AgeI</i> to give 252 and 229 bp fragments. R445W allele is not digested by <i>AgeI</i> . |
| SLC1A1-fl        | CCTGCCACGCAAACTACC               | CTTACCCACACCCAAATCC              | 1988 | Amplified from human kidney cDNA, cloned into pGEM-T-Easy                                                                                                        |
| SLC1A1-fl(EcoRI) | AATAGAATTCACAGCCATGGGGAAA<br>CCG | CTAGGAATTCTTACCCACACCC<br>AAATCC | 1793 | EcoRI ends, cloned into pcDNA3.1-HA                                                                                                                              |

**Supplementary Table 1** PCR primers used in this study (5'-3').
